# Supplementary material
Source: publisher figshare collection journal article supplement (https://frontiersin.figshare.com/ndownloader/files/18600206)
Supplement: Supplementary file [file 18600206]

# **Ensuring best practice in genomic education and evaluation: a program logic approach**

Nisselle A, Martyn M, Jordan H, Kaunein N, McEwen A, Patel C, Terrill B, Bishop M, Metcalfe S & C Gaff on behalf of the Genomic Education and Evaluation Working Party

*Frontiers in Genetics*, 2019

## **Supplementary Materials**

Detailed program logic models describing all four local contexts:

**Supplementary Figure 1.** Mapping the different program logic model components to the development of clinical genomic workshops for pediatricians.

**Supplementary Figure 2.** Using the different program logic model components for stakeholder management and reporting when developing competencies.

**Supplementary Figure 3.** Using the program logic model as a tool for reflection and targeted evaluation for quality improvement.

**Supplementary Figure 4.** Mapping the different program logic model components to a cyclical co-design approach when developing a university course.

**Supplementary Figure 1.** Mapping the different program logic model components to the development of clinical genomic workshops for pediatricians.

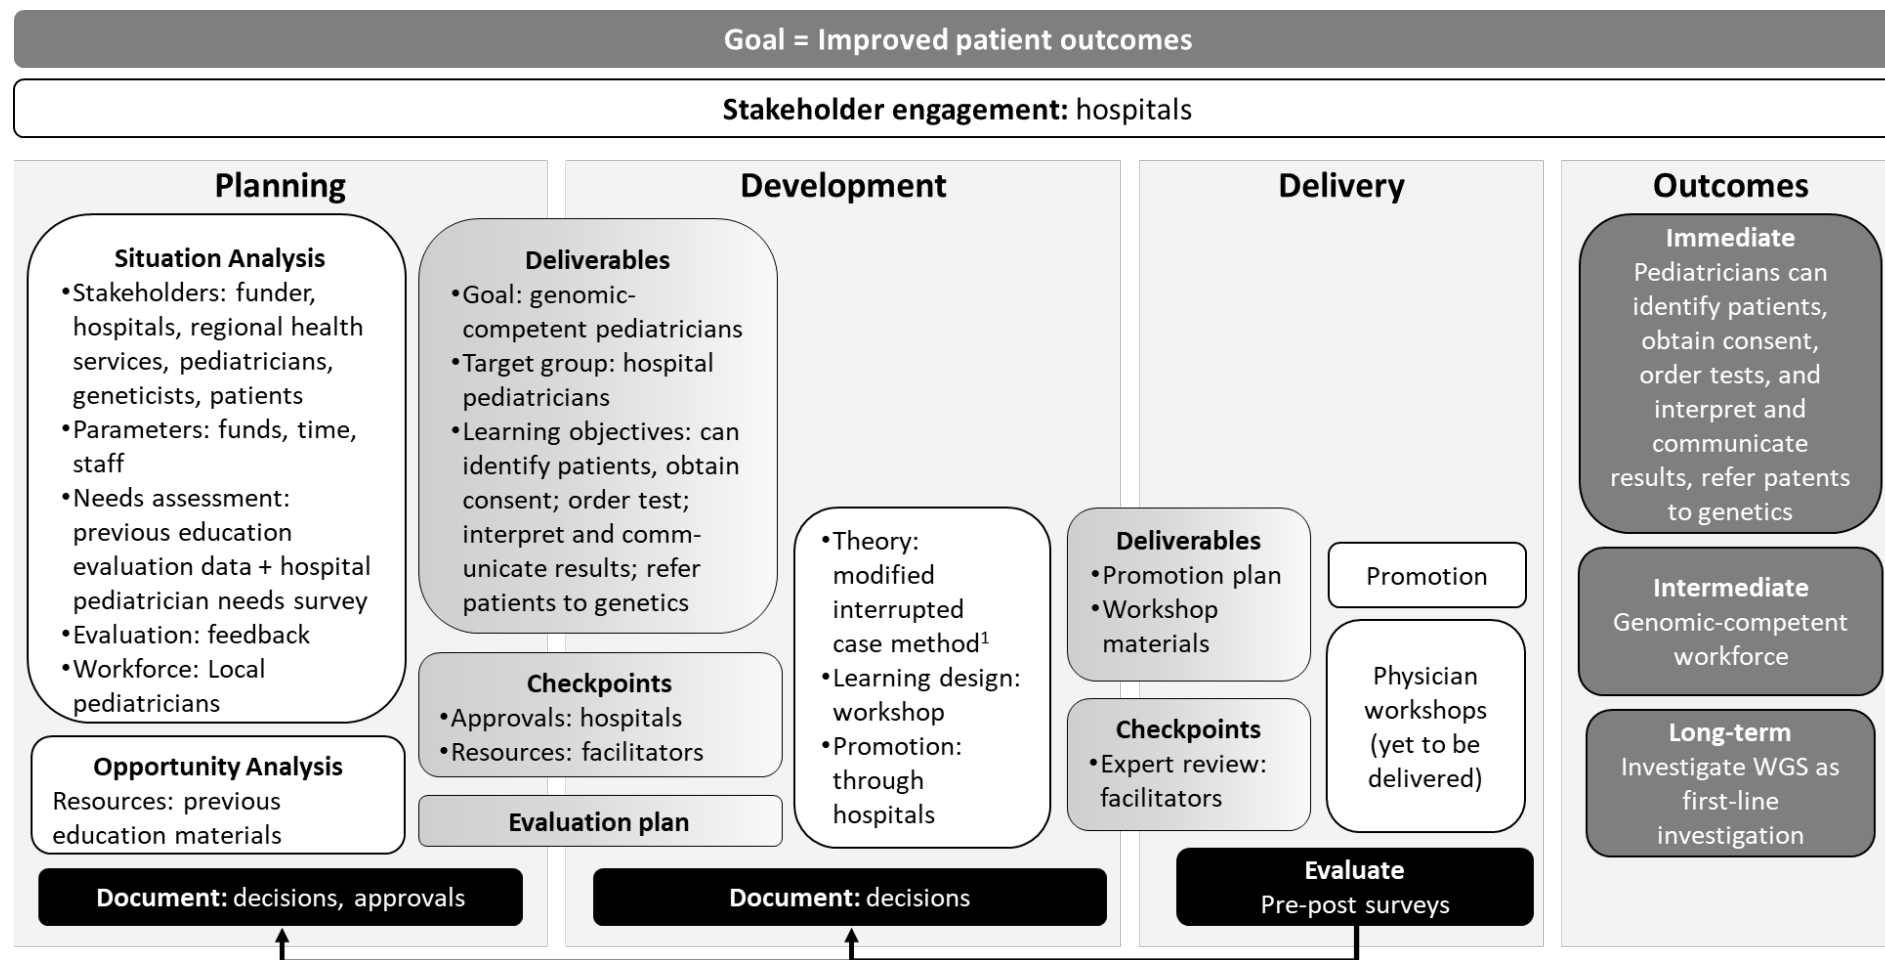

**Supplementary Figure 2.** Using the different program logic model components for stakeholder management and reporting when developing competencies.

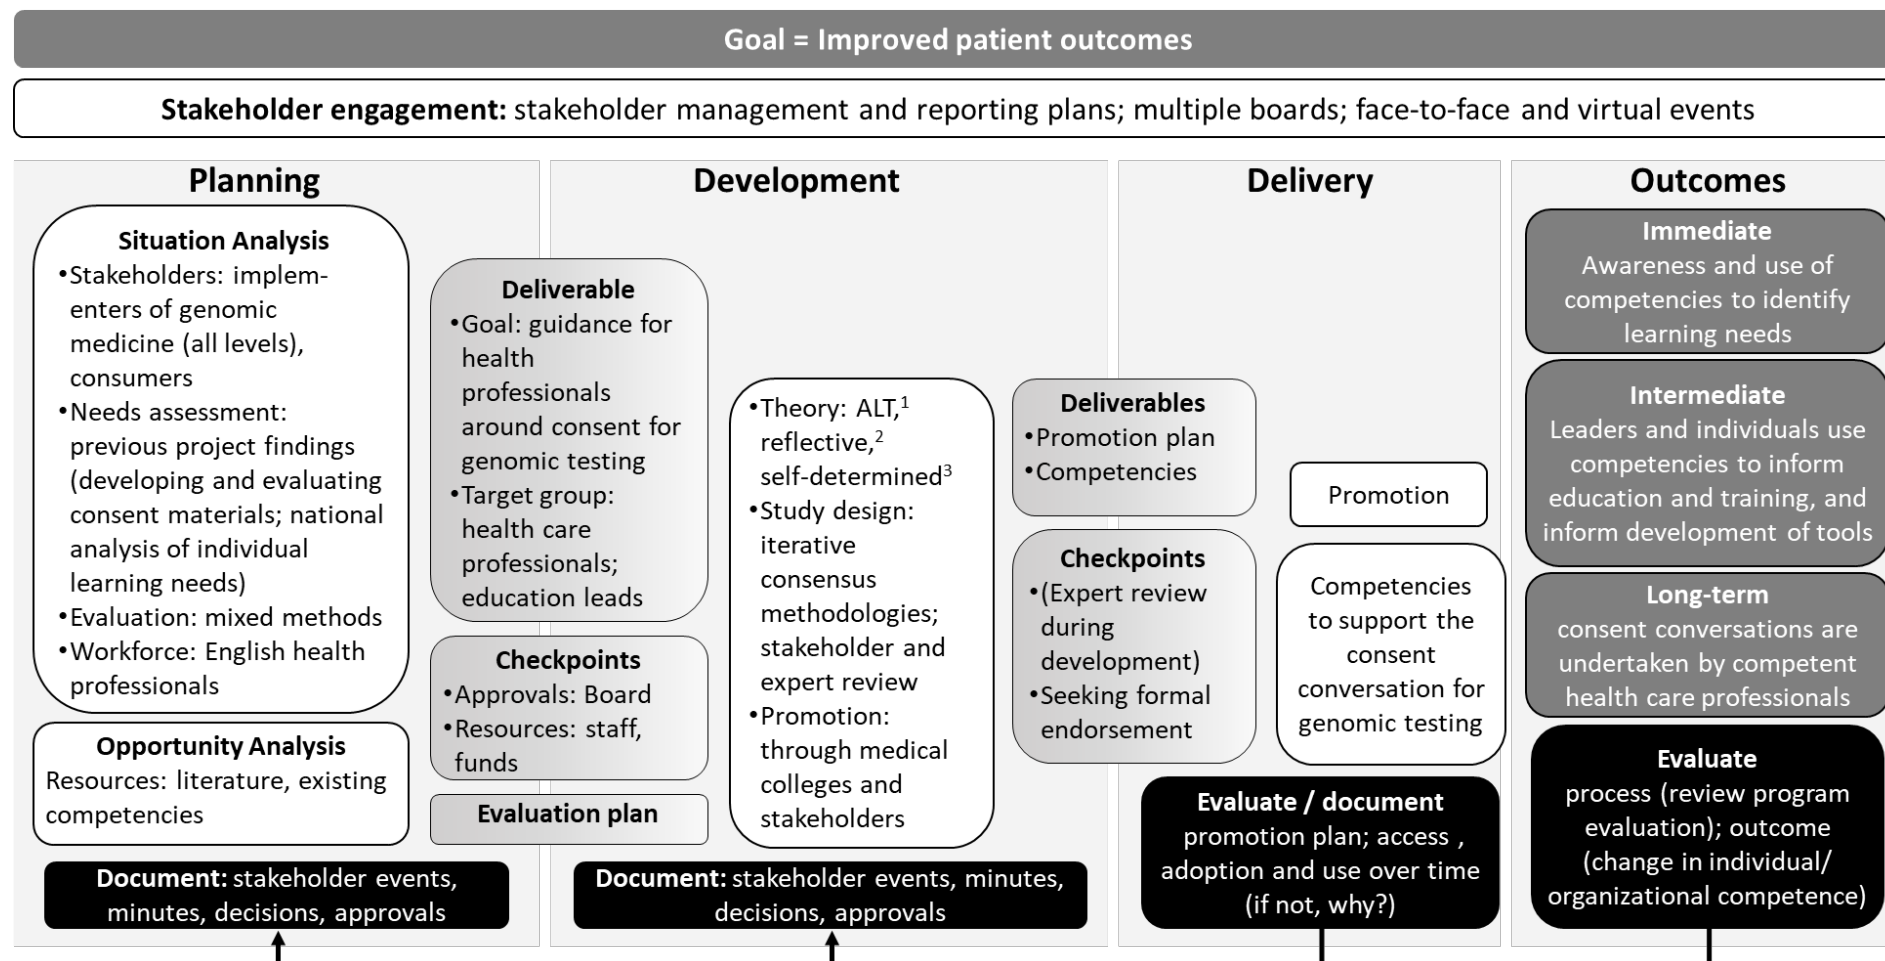

<sup>1</sup> Adult learning theory (Campbell et al., 2010); <sup>2</sup> (Schon, 1983); <sup>3</sup> (Hase, 2009).

**Supplementary Figure 3.** Using the program logic model as a tool for clarificative evaluation during development of online modules for medical specialists.

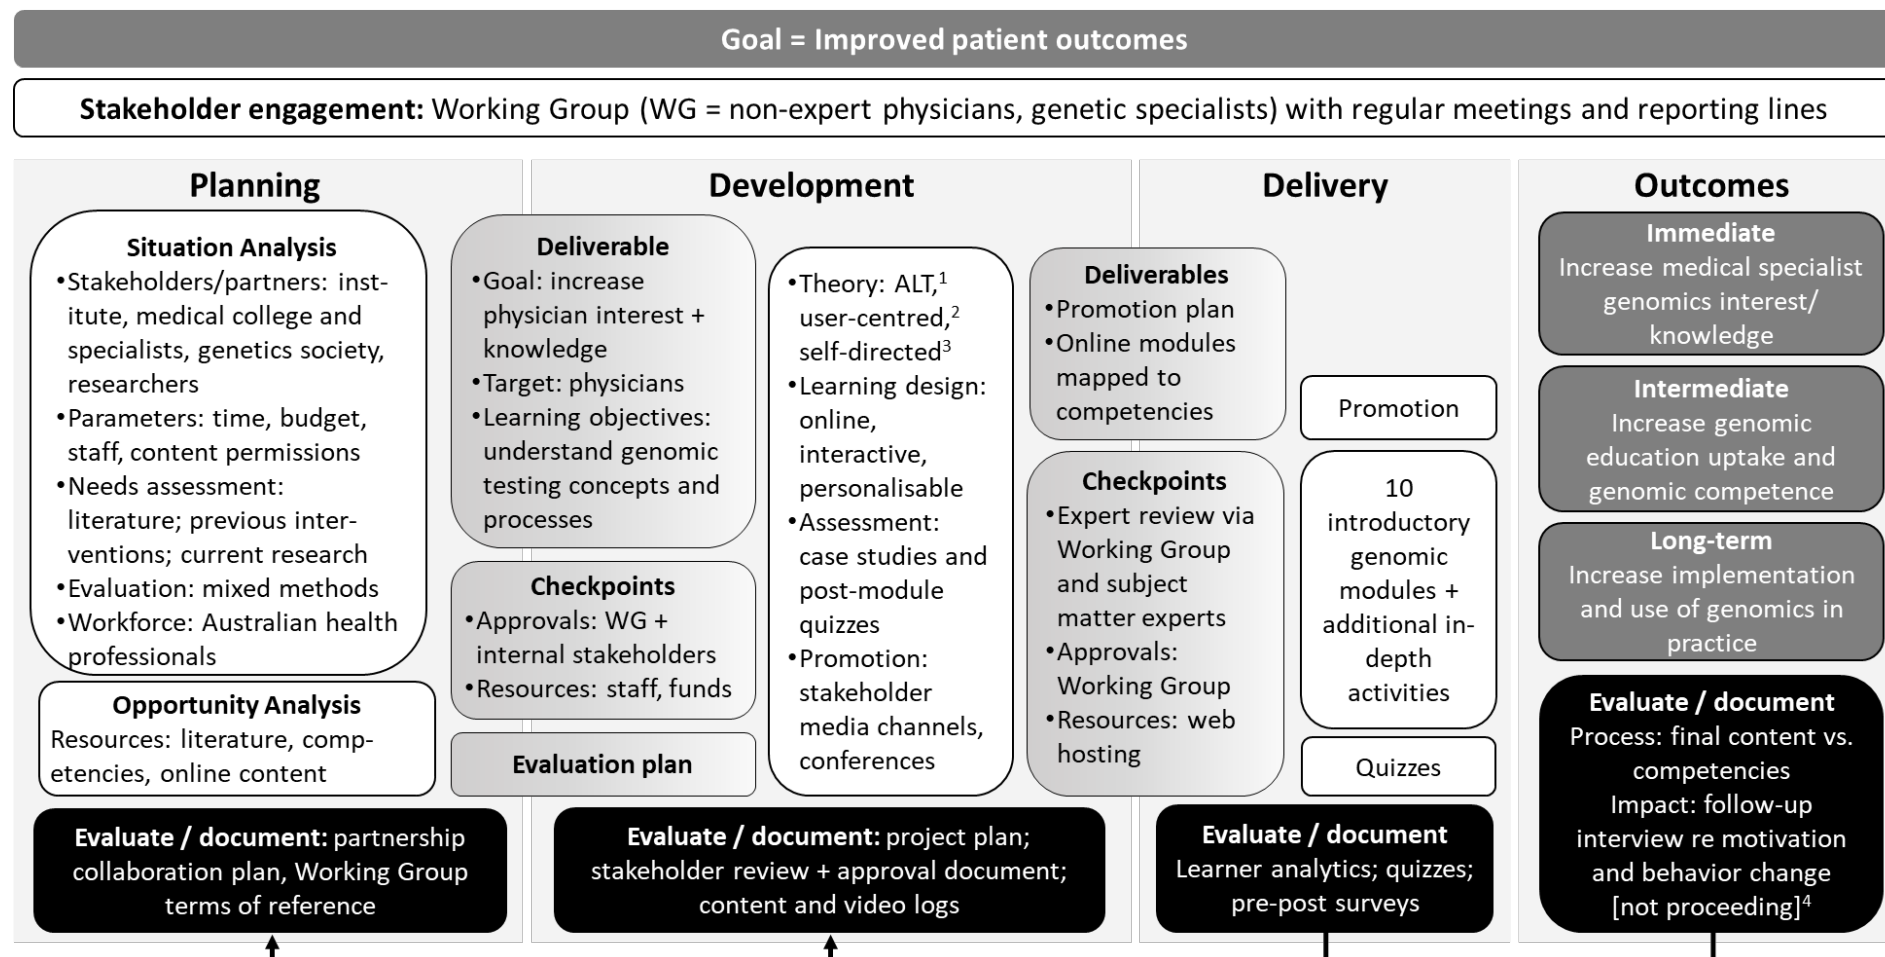

<sup>1</sup> Adult learning theory (Taylor and Hamdy, 2013); <sup>2</sup> (Beetham and Sharpe, 2013); <sup>3</sup> (Hase, 2009).

**Supplementary Figure 4.** Mapping the different program logic model components to a cyclical co-design approach when developing a university course.

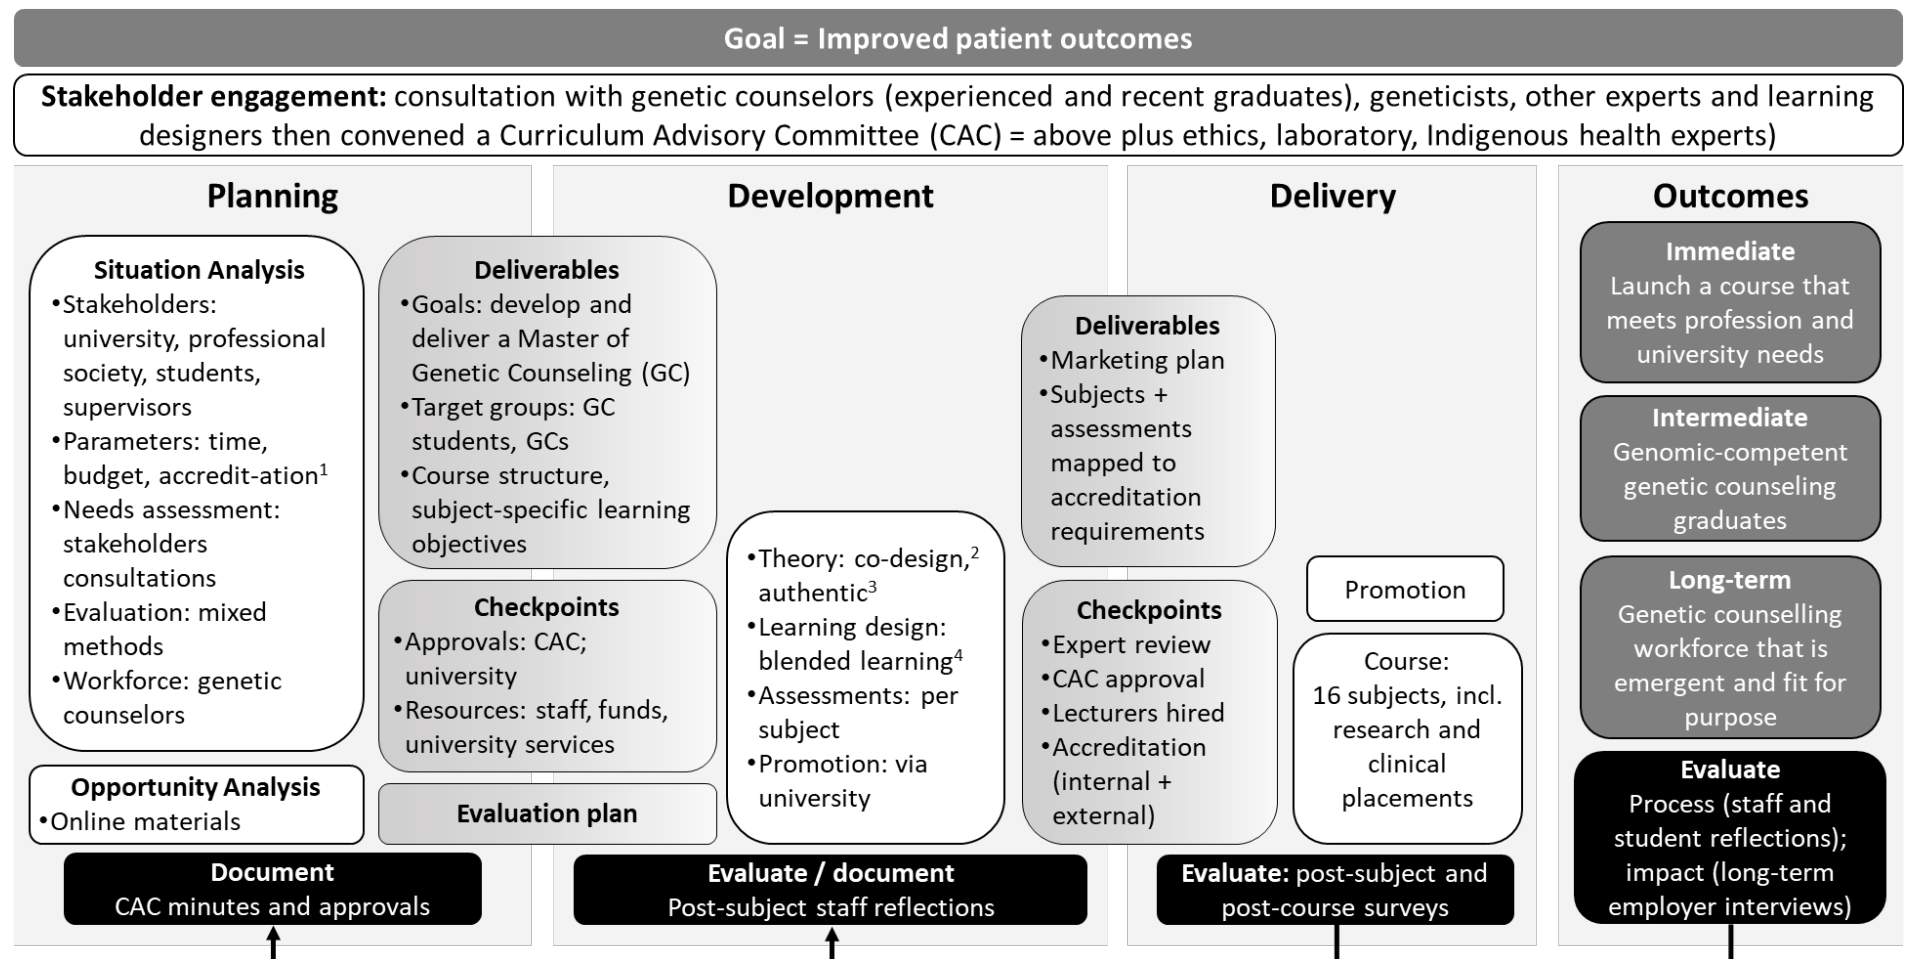

<sup>1</sup> including the Australian Qualifications Framework ([www.aqf.edu.au/aqf-levels](http://www.aqf.edu.au/aqf-levels)); <sup>2</sup> (McEwen et al., 2019); <sup>3</sup> (Herrington and Oliver, 2000);

<sup>4</sup> (McGee and Reis, 2012).
